# Supplementary material for: Identification and verification of a glycolysis-related gene signature for gastric cancer
Source: PubMed Central journal article supplement — Ann Transl Med. 2022 Sep;10(18):1010. doi: 10.21037/atm-22-3980 (PMC9577805; doi:10.21037/atm-22-3980), 2022-09
Supplement: atm-10-18-1010-coif.pdf [file atm-10-18-1010-coif.pdf]

## ICMJE DISCLOSURE FORM

Date: August 5, 2022

Your Name: Yi Liu

Manuscript Title: Identification and verification of a glycolysis-related gene signature for gastric cancer

Manuscript number (if known):

In the interest of transparency, we ask you to disclose all relationships/activities/interests listed below that are related to the content of your manuscript. “Related” means any relation with for-profit or not-for-profit third parties whose interests may be affected by the content of the manuscript. Disclosure represents a commitment to transparency and does not necessarily indicate a bias. If you are in doubt about whether to list a relationship/activity/interest, it is preferable that you do so.

The following questions apply to the author’s relationships/activities/interests as they relate to the current manuscript only.

The author’s relationships/activities/interests should be defined broadly. For example, if your manuscript pertains to the epidemiology of hypertension, you should declare all relationships with manufacturers of antihypertensive medication, even if that medication is not mentioned in the manuscript.

In item #1 below, report all support for the work reported in this manuscript without time limit. For all other items, the time frame for disclosure is the past 36 months.

|                                                           |                                                                                                                                                                                | Name all entities with whom you have this relationship or indicate none (add rows as needed)                                                                                                                                                                                                                                                                                                                                  | Specifications/Comments (e.g., if payments were made to you or to your institution)                                                                                                    |
|-----------------------------------------------------------|--------------------------------------------------------------------------------------------------------------------------------------------------------------------------------|-------------------------------------------------------------------------------------------------------------------------------------------------------------------------------------------------------------------------------------------------------------------------------------------------------------------------------------------------------------------------------------------------------------------------------|----------------------------------------------------------------------------------------------------------------------------------------------------------------------------------------|
| <b>Time frame: Since the initial planning of the work</b> |                                                                                                                                                                                |                                                                                                                                                                                                                                                                                                                                                                                                                               |                                                                                                                                                                                        |
| 1                                                         | All support for the present manuscript (e.g., funding, provision of study materials, medical writing, article processing charges, etc.)<br><b>No time limit for this item.</b> | the National Natural Science Foundation of China—Youth Projects<br>the Shaanxi Natural Science Foundation<br>the Shaanxi Innovative Talents Cultivate Program<br>the Operating Expenses of Basic Scientific Research Project of Xi’an Jiaotong University<br>the Science and Technology Project of Xi’an<br>the Shaanxi Province Key Industry Innovation Chain (Group) Project—Social Development Field<br>the Scientific and | grant no. 81402012<br>grant no. 2019JM-547<br>grant no. 2017KCT-28<br>grant no. xzy012019112<br>grant no. 2019114613YX- 001SF035[3]<br>grant no. 2021ZDLSF01-07<br>grant no. 2021LJ-02 |

|                                   |                                                                                                              |                                                                                                            |                     |
|-----------------------------------|--------------------------------------------------------------------------------------------------------------|------------------------------------------------------------------------------------------------------------|---------------------|
|                                   |                                                                                                              | Technological Talents Support Plan of Shaanxi Provincial People's Hospital (Leading Talents)               |                     |
|                                   |                                                                                                              | the Scientific and Technological Talents Support Plan of Shaanxi Provincial People's Hospital (Top Talent) | grant no. 2021BJ-01 |
| <b>Time frame: past 36 months</b> |                                                                                                              |                                                                                                            |                     |
| 2                                 | Grants or contracts from any entity (if not indicated in item #1 above).                                     | ___ None                                                                                                   |                     |
| 3                                 | Royalties or licenses                                                                                        | ___ None                                                                                                   |                     |
| 4                                 | Consulting fees                                                                                              | ___ None                                                                                                   |                     |
| 5                                 | Payment or honoraria for lectures, presentations, speakers bureaus, manuscript writing or educational events | ___ None                                                                                                   |                     |
| 6                                 | Payment for expert testimony                                                                                 | ___ None                                                                                                   |                     |
| 7                                 | Support for attending meetings and/or travel                                                                 | ___ None                                                                                                   |                     |
| 8                                 | Patents planned, issued or pending                                                                           | ___ None                                                                                                   |                     |
| 9                                 | Participation on a Data Safety Monitoring Board or Advisory Board                                            | ___ None                                                                                                   |                     |
| 10                                | Leadership or fiduciary role in other board, society, committee or advocacy group, paid or unpaid            | ___ None                                                                                                   |                     |
| 11                                | Stock or stock options                                                                                       | ___ None                                                                                                   |                     |
| 12                                | Receipt of equipment, materials, drugs, medical writing, gifts or other services                             | ___ None                                                                                                   |                     |
| 13                                | Other financial or non-financial interests                                                                   | ___ None                                                                                                   |                     |

|  |  |  |  |
|--|--|--|--|
|  |  |  |  |
|--|--|--|--|

**Please summarize the above conflict of interest in the following box:**

The author reports that this work was supported by the National Natural Science Foundation of China—Youth Projects (grant no. 81402012), the Shaanxi Natural Science Foundation (grant no. 2019JM-547), the Shaanxi Innovative Talents Cultivate Program (grant no. 2017KCT-28), the Operating Expenses of Basic Scientific Research Project of Xi'an Jiaotong University (grant no. xzy012019112), the Science and Technology Project of Xi'an (grant no. 2019114613YX- 001SF035[3]), the Shaanxi Province Key Industry Innovation Chain (Group) Project—Social Development Field (no. 2021ZDLSF01-07), the Scientific and Technological Talents Support Plan of Shaanxi Provincial People's Hospital (Leading Talents) (no. 2021LJ-02), and the Scientific and Technological Talents Support Plan of Shaanxi Provincial People's Hospital (Top Talent) (no. 2021BJ-01).

**Please place an "X" next to the following statement to indicate your agreement:**

**X I certify that I have answered every question and have not altered the wording of any of the questions on this form.**

## ICMJE DISCLOSURE FORM

Date: August 5, 2022

Your Name: Min Wu

Manuscript Title: Identification and verification of a glycolysis-related gene signature for gastric cancer

Manuscript number (if known):

In the interest of transparency, we ask you to disclose all relationships/activities/interests listed below that are related to the content of your manuscript. “Related” means any relation with for-profit or not-for-profit third parties whose interests may be affected by the content of the manuscript. Disclosure represents a commitment to transparency and does not necessarily indicate a bias. If you are in doubt about whether to list a relationship/activity/interest, it is preferable that you do so.

The following questions apply to the author’s relationships/activities/interests as they relate to the current manuscript only.

The author’s relationships/activities/interests should be defined broadly. For example, if your manuscript pertains to the epidemiology of hypertension, you should declare all relationships with manufacturers of antihypertensive medication, even if that medication is not mentioned in the manuscript.

In item #1 below, report all support for the work reported in this manuscript without time limit. For all other items, the time frame for disclosure is the past 36 months.

|                                                           |                                                                                                                                                                                | Name all entities with whom you have this relationship or indicate none (add rows as needed)                                                                                                                                                                                                                                                                                                                                  | Specifications/Comments (e.g., if payments were made to you or to your institution)                                                                                                    |
|-----------------------------------------------------------|--------------------------------------------------------------------------------------------------------------------------------------------------------------------------------|-------------------------------------------------------------------------------------------------------------------------------------------------------------------------------------------------------------------------------------------------------------------------------------------------------------------------------------------------------------------------------------------------------------------------------|----------------------------------------------------------------------------------------------------------------------------------------------------------------------------------------|
| <b>Time frame: Since the initial planning of the work</b> |                                                                                                                                                                                |                                                                                                                                                                                                                                                                                                                                                                                                                               |                                                                                                                                                                                        |
| 1                                                         | All support for the present manuscript (e.g., funding, provision of study materials, medical writing, article processing charges, etc.)<br><b>No time limit for this item.</b> | the National Natural Science Foundation of China—Youth Projects<br>the Shaanxi Natural Science Foundation<br>the Shaanxi Innovative Talents Cultivate Program<br>the Operating Expenses of Basic Scientific Research Project of Xi’an Jiaotong University<br>the Science and Technology Project of Xi’an<br>the Shaanxi Province Key Industry Innovation Chain (Group) Project—Social Development Field<br>the Scientific and | grant no. 81402012<br>grant no. 2019JM-547<br>grant no. 2017KCT-28<br>grant no. xzy012019112<br>grant no. 2019114613YX- 001SF035[3]<br>grant no. 2021ZDLSF01-07<br>grant no. 2021LJ-02 |

|                                   |                                                                                                              |                                                                                                            |                     |
|-----------------------------------|--------------------------------------------------------------------------------------------------------------|------------------------------------------------------------------------------------------------------------|---------------------|
|                                   |                                                                                                              | Technological Talents Support Plan of Shaanxi Provincial People's Hospital (Leading Talents)               |                     |
|                                   |                                                                                                              | the Scientific and Technological Talents Support Plan of Shaanxi Provincial People's Hospital (Top Talent) | grant no. 2021BJ-01 |
| <b>Time frame: past 36 months</b> |                                                                                                              |                                                                                                            |                     |
| 2                                 | Grants or contracts from any entity (if not indicated in item #1 above).                                     | ___ None                                                                                                   |                     |
| 3                                 | Royalties or licenses                                                                                        | ___ None                                                                                                   |                     |
| 4                                 | Consulting fees                                                                                              | ___ None                                                                                                   |                     |
| 5                                 | Payment or honoraria for lectures, presentations, speakers bureaus, manuscript writing or educational events | ___ None                                                                                                   |                     |
| 6                                 | Payment for expert testimony                                                                                 | ___ None                                                                                                   |                     |
| 7                                 | Support for attending meetings and/or travel                                                                 | ___ None                                                                                                   |                     |
| 8                                 | Patents planned, issued or pending                                                                           | ___ None                                                                                                   |                     |
| 9                                 | Participation on a Data Safety Monitoring Board or Advisory Board                                            | ___ None                                                                                                   |                     |
| 10                                | Leadership or fiduciary role in other board, society, committee or advocacy group, paid or unpaid            | ___ None                                                                                                   |                     |
| 11                                | Stock or stock options                                                                                       | ___ None                                                                                                   |                     |
| 12                                | Receipt of equipment, materials, drugs, medical writing, gifts or other services                             | ___ None                                                                                                   |                     |
| 13                                | Other financial or non-financial interests                                                                   | ___ None                                                                                                   |                     |

|  |  |  |  |
|--|--|--|--|
|  |  |  |  |
|--|--|--|--|

**Please summarize the above conflict of interest in the following box:**

The author reports that this work was supported by the National Natural Science Foundation of China—Youth Projects (grant no. 81402012), the Shaanxi Natural Science Foundation (grant no. 2019JM-547), the Shaanxi Innovative Talents Cultivate Program (grant no. 2017KCT-28), the Operating Expenses of Basic Scientific Research Project of Xi'an Jiaotong University (grant no. xzy012019112), the Science and Technology Project of Xi'an (grant no. 2019114613YX-001SF035[3]), the Shaanxi Province Key Industry Innovation Chain (Group) Project—Social Development Field (no. 2021ZDLSF01-07), the Scientific and Technological Talents Support Plan of Shaanxi Provincial People's Hospital (Leading Talents) (no. 2021LJ-02), and the Scientific and Technological Talents Support Plan of Shaanxi Provincial People's Hospital (Top Talent) (no. 2021BJ-01).

**Please place an "X" next to the following statement to indicate your agreement:**

**X I certify that I have answered every question and have not altered the wording of any of the questions on this form.**

## ICMJE DISCLOSURE FORM

Date: August 5, 2022

Your Name: Jian Cao

Manuscript Title: Identification and verification of a glycolysis-related gene signature for gastric cancer

Manuscript number (if known):

In the interest of transparency, we ask you to disclose all relationships/activities/interests listed below that are related to the content of your manuscript. “Related” means any relation with for-profit or not-for-profit third parties whose interests may be affected by the content of the manuscript. Disclosure represents a commitment to transparency and does not necessarily indicate a bias. If you are in doubt about whether to list a relationship/activity/interest, it is preferable that you do so.

The following questions apply to the author’s relationships/activities/interests as they relate to the current manuscript only.

The author’s relationships/activities/interests should be defined broadly. For example, if your manuscript pertains to the epidemiology of hypertension, you should declare all relationships with manufacturers of antihypertensive medication, even if that medication is not mentioned in the manuscript.

In item #1 below, report all support for the work reported in this manuscript without time limit. For all other items, the time frame for disclosure is the past 36 months.

|                                                           |                                                                                                                                                                                | Name all entities with whom you have this relationship or indicate none (add rows as needed)                                                                                                                                                                                                                                                                                                                                  | Specifications/Comments (e.g., if payments were made to you or to your institution)                                                                                                    |
|-----------------------------------------------------------|--------------------------------------------------------------------------------------------------------------------------------------------------------------------------------|-------------------------------------------------------------------------------------------------------------------------------------------------------------------------------------------------------------------------------------------------------------------------------------------------------------------------------------------------------------------------------------------------------------------------------|----------------------------------------------------------------------------------------------------------------------------------------------------------------------------------------|
| <b>Time frame: Since the initial planning of the work</b> |                                                                                                                                                                                |                                                                                                                                                                                                                                                                                                                                                                                                                               |                                                                                                                                                                                        |
| 1                                                         | All support for the present manuscript (e.g., funding, provision of study materials, medical writing, article processing charges, etc.)<br><b>No time limit for this item.</b> | the National Natural Science Foundation of China—Youth Projects<br>the Shaanxi Natural Science Foundation<br>the Shaanxi Innovative Talents Cultivate Program<br>the Operating Expenses of Basic Scientific Research Project of Xi’an Jiaotong University<br>the Science and Technology Project of Xi’an<br>the Shaanxi Province Key Industry Innovation Chain (Group) Project—Social Development Field<br>the Scientific and | grant no. 81402012<br>grant no. 2019JM-547<br>grant no. 2017KCT-28<br>grant no. xzy012019112<br>grant no. 2019114613YX- 001SF035[3]<br>grant no. 2021ZDLSF01-07<br>grant no. 2021LJ-02 |

|                                   |                                                                                                              |                                                                                                            |                     |
|-----------------------------------|--------------------------------------------------------------------------------------------------------------|------------------------------------------------------------------------------------------------------------|---------------------|
|                                   |                                                                                                              | Technological Talents Support Plan of Shaanxi Provincial People's Hospital (Leading Talents)               |                     |
|                                   |                                                                                                              | the Scientific and Technological Talents Support Plan of Shaanxi Provincial People's Hospital (Top Talent) | grant no. 2021BJ-01 |
| <b>Time frame: past 36 months</b> |                                                                                                              |                                                                                                            |                     |
| 2                                 | Grants or contracts from any entity (if not indicated in item #1 above).                                     | ___ None                                                                                                   |                     |
| 3                                 | Royalties or licenses                                                                                        | ___ None                                                                                                   |                     |
| 4                                 | Consulting fees                                                                                              | ___ None                                                                                                   |                     |
| 5                                 | Payment or honoraria for lectures, presentations, speakers bureaus, manuscript writing or educational events | ___ None                                                                                                   |                     |
| 6                                 | Payment for expert testimony                                                                                 | ___ None                                                                                                   |                     |
| 7                                 | Support for attending meetings and/or travel                                                                 | ___ None                                                                                                   |                     |
| 8                                 | Patents planned, issued or pending                                                                           | ___ None                                                                                                   |                     |
| 9                                 | Participation on a Data Safety Monitoring Board or Advisory Board                                            | ___ None                                                                                                   |                     |
| 10                                | Leadership or fiduciary role in other board, society, committee or advocacy group, paid or unpaid            | ___ None                                                                                                   |                     |
| 11                                | Stock or stock options                                                                                       | ___ None                                                                                                   |                     |
| 12                                | Receipt of equipment, materials, drugs, medical writing, gifts or other services                             | ___ None                                                                                                   |                     |
| 13                                | Other financial or non-financial interests                                                                   | ___ None                                                                                                   |                     |



|  |  |  |  |
|--|--|--|--|
|  |  |  |  |
|--|--|--|--|

**Please summarize the above conflict of interest in the following box:**

The author reports that this work was supported by the National Natural Science Foundation of China—Youth Projects (grant no. 81402012), the Shaanxi Natural Science Foundation (grant no. 2019JM-547), the Shaanxi Innovative Talents Cultivate Program (grant no. 2017KCT-28), the Operating Expenses of Basic Scientific Research Project of Xi’an Jiaotong University (grant no. xzy012019112), the Science and Technology Project of Xi’an (grant no. 2019114613YX- 001SF035[3]), the Shaanxi Province Key Industry Innovation Chain (Group) Project—Social Development Field (no. 2021ZDLSF01-07), the Scientific and Technological Talents Support Plan of Shaanxi Provincial People's Hospital (Leading Talents) (no. 2021LJ-02), and the Scientific and Technological Talents Support Plan of Shaanxi Provincial People’s Hospital (Top Talent) (no.2021BJ-01).

**Please place an “X” next to the following statement to indicate your agreement:**

**X I certify that I have answered every question and have not altered the wording of any of the questions on this form.**

## ICMJE DISCLOSURE FORM

Date: August 5, 2022

Your Name: Yaning Zhu

Manuscript Title: Identification and verification of a glycolysis-related gene signature for gastric cancer

Manuscript number (if known):

In the interest of transparency, we ask you to disclose all relationships/activities/interests listed below that are related to the content of your manuscript. “Related” means any relation with for-profit or not-for-profit third parties whose interests may be affected by the content of the manuscript. Disclosure represents a commitment to transparency and does not necessarily indicate a bias. If you are in doubt about whether to list a relationship/activity/interest, it is preferable that you do so.

The following questions apply to the author’s relationships/activities/interests as they relate to the current manuscript only.

The author’s relationships/activities/interests should be defined broadly. For example, if your manuscript pertains to the epidemiology of hypertension, you should declare all relationships with manufacturers of antihypertensive medication, even if that medication is not mentioned in the manuscript.

In item #1 below, report all support for the work reported in this manuscript without time limit. For all other items, the time frame for disclosure is the past 36 months.

|                                                           |                                                                                                                                                                                | Name all entities with whom you have this relationship or indicate none (add rows as needed)                                                                                                                                                                                                                                                                                                                                                        | Specifications/Comments (e.g., if payments were made to you or to your institution)                                                                                                    |
|-----------------------------------------------------------|--------------------------------------------------------------------------------------------------------------------------------------------------------------------------------|-----------------------------------------------------------------------------------------------------------------------------------------------------------------------------------------------------------------------------------------------------------------------------------------------------------------------------------------------------------------------------------------------------------------------------------------------------|----------------------------------------------------------------------------------------------------------------------------------------------------------------------------------------|
| <b>Time frame: Since the initial planning of the work</b> |                                                                                                                                                                                |                                                                                                                                                                                                                                                                                                                                                                                                                                                     |                                                                                                                                                                                        |
| 1                                                         | All support for the present manuscript (e.g., funding, provision of study materials, medical writing, article processing charges, etc.)<br><b>No time limit for this item.</b> | the National Natural Science Foundation of China—Youth Projects<br>the Shaanxi Natural Science Foundation<br>the Shaanxi Innovative Talents Cultivate Program<br>the Operating Expenses of Basic Scientific Research Project of Xi’an Jiaotong University<br>the Science and Technology Project of Xi’an<br>the Shaanxi Province Key Industry Innovation Chain (Group) Project—Social Development Field<br>the Scientific and Technological Talents | grant no. 81402012<br>grant no. 2019JM-547<br>grant no. 2017KCT-28<br>grant no. xzy012019112<br>grant no. 2019114613YX- 001SF035[3]<br>grant no. 2021ZDLSF01-07<br>grant no. 2021LJ-02 |

|                                   |                                                                                                              |                                                                                                            |                     |
|-----------------------------------|--------------------------------------------------------------------------------------------------------------|------------------------------------------------------------------------------------------------------------|---------------------|
|                                   |                                                                                                              | Support Plan of Shaanxi Provincial People's Hospital (Leading Talents)                                     |                     |
|                                   |                                                                                                              | the Scientific and Technological Talents Support Plan of Shaanxi Provincial People's Hospital (Top Talent) | grant no. 2021BJ-01 |
| <b>Time frame: past 36 months</b> |                                                                                                              |                                                                                                            |                     |
| 2                                 | Grants or contracts from any entity (if not indicated in item #1 above).                                     | ___ None                                                                                                   |                     |
| 3                                 | Royalties or licenses                                                                                        | ___ None                                                                                                   |                     |
| 4                                 | Consulting fees                                                                                              | ___ None                                                                                                   |                     |
| 5                                 | Payment or honoraria for lectures, presentations, speakers bureaus, manuscript writing or educational events | ___ None                                                                                                   |                     |
| 6                                 | Payment for expert testimony                                                                                 | ___ None                                                                                                   |                     |
| 7                                 | Support for attending meetings and/or travel                                                                 | ___ None                                                                                                   |                     |
| 8                                 | Patents planned, issued or pending                                                                           | ___ None                                                                                                   |                     |
| 9                                 | Participation on a Data Safety Monitoring Board or Advisory Board                                            | ___ None                                                                                                   |                     |
| 10                                | Leadership or fiduciary role in other board, society, committee or advocacy group, paid or unpaid            | ___ None                                                                                                   |                     |
| 11                                | Stock or stock options                                                                                       | ___ None                                                                                                   |                     |
| 12                                | Receipt of equipment, materials, drugs, medical writing, gifts or other services                             | ___ None                                                                                                   |                     |
| 13                                | Other financial or non-financial interests                                                                   | ___ None                                                                                                   |                     |

**Please summarize the above conflict of interest in the following box:**

The author reports that this work was supported by the National Natural Science Foundation of China—Youth Projects (grant no. 81402012), the Shaanxi Natural Science Foundation (grant no. 2019JM-547), the Shaanxi Innovative Talents Cultivate Program (grant no. 2017KCT-28), the Operating Expenses of Basic Scientific Research Project of Xi'an Jiaotong University (grant no. xzy012019112), the Science and Technology Project of Xi'an (grant no. 2019114613YX-001SF035[3]), the Shaanxi Province Key Industry Innovation Chain (Group) Project—Social Development Field (no. 2021ZDLSF01-07), the Scientific and Technological Talents Support Plan of Shaanxi Provincial People's Hospital (Leading Talents) (no. 2021LJ-02), and the Scientific and Technological Talents Support Plan of Shaanxi Provincial People's Hospital (Top Talent) (no. 2021BJ-01).

**Please place an "X" next to the following statement to indicate your agreement:**

**X I certify that I have answered every question and have not altered the wording of any of the questions on this form.**

## ICMJE DISCLOSURE FORM

Date: August 5, 2022

Your Name: Yu Ma

Manuscript Title: Manuscript Title: Identification and verification of a glycolysis-related gene signature for gastric cancer

Manuscript number (if known):

In the interest of transparency, we ask you to disclose all relationships/activities/interests listed below that are related to the content of your manuscript. "Related" means any relation with for-profit or not-for-profit third parties whose interests may be affected by the content of the manuscript. Disclosure represents a commitment to transparency and does not necessarily indicate a bias. If you are in doubt about whether to list a relationship/activity/interest, it is preferable that you do so.

The following questions apply to the author's relationships/activities/interests as they relate to the current manuscript only.

The author's relationships/activities/interests should be defined broadly. For example, if your manuscript pertains to the epidemiology of hypertension, you should declare all relationships with manufacturers of antihypertensive medication, even if that medication is not mentioned in the manuscript.

In item #1 below, report all support for the work reported in this manuscript without time limit. For all other items, the time frame for disclosure is the past 36 months.

|                                                           |                                                                                                                                                                                | Name all entities with whom you have this relationship or indicate none (add rows as needed)                                                                                                                                                                                                                                                                                                                                  | Specifications/Comments (e.g., if payments were made to you or to your institution)                                                                                                    |
|-----------------------------------------------------------|--------------------------------------------------------------------------------------------------------------------------------------------------------------------------------|-------------------------------------------------------------------------------------------------------------------------------------------------------------------------------------------------------------------------------------------------------------------------------------------------------------------------------------------------------------------------------------------------------------------------------|----------------------------------------------------------------------------------------------------------------------------------------------------------------------------------------|
| <b>Time frame: Since the initial planning of the work</b> |                                                                                                                                                                                |                                                                                                                                                                                                                                                                                                                                                                                                                               |                                                                                                                                                                                        |
| 1                                                         | All support for the present manuscript (e.g., funding, provision of study materials, medical writing, article processing charges, etc.)<br><b>No time limit for this item.</b> | the National Natural Science Foundation of China—Youth Projects<br>the Shaanxi Natural Science Foundation<br>the Shaanxi Innovative Talents Cultivate Program<br>the Operating Expenses of Basic Scientific Research Project of Xi'an Jiaotong University<br>the Science and Technology Project of Xi'an<br>the Shaanxi Province Key Industry Innovation Chain (Group) Project—Social Development Field<br>the Scientific and | grant no. 81402012<br>grant no. 2019JM-547<br>grant no. 2017KCT-28<br>grant no. xzy012019112<br>grant no. 2019114613YX- 001SF035[3]<br>grant no. 2021ZDLSF01-07<br>grant no. 2021LJ-02 |

|                                   |                                                                                                              |                                                                                                            |                     |
|-----------------------------------|--------------------------------------------------------------------------------------------------------------|------------------------------------------------------------------------------------------------------------|---------------------|
|                                   |                                                                                                              | Technological Talents Support Plan of Shaanxi Provincial People's Hospital (Leading Talents)               |                     |
|                                   |                                                                                                              | the Scientific and Technological Talents Support Plan of Shaanxi Provincial People's Hospital (Top Talent) | grant no. 2021BJ-01 |
| <b>Time frame: past 36 months</b> |                                                                                                              |                                                                                                            |                     |
| 2                                 | Grants or contracts from any entity (if not indicated in item #1 above).                                     | ___ None                                                                                                   |                     |
| 3                                 | Royalties or licenses                                                                                        | ___ None                                                                                                   |                     |
| 4                                 | Consulting fees                                                                                              | ___ None                                                                                                   |                     |
| 5                                 | Payment or honoraria for lectures, presentations, speakers bureaus, manuscript writing or educational events | ___ None                                                                                                   |                     |
| 6                                 | Payment for expert testimony                                                                                 | ___ None                                                                                                   |                     |
| 7                                 | Support for attending meetings and/or travel                                                                 | ___ None                                                                                                   |                     |
| 8                                 | Patents planned, issued or pending                                                                           | ___ None                                                                                                   |                     |
| 9                                 | Participation on a Data Safety Monitoring Board or Advisory Board                                            | ___ None                                                                                                   |                     |
| 10                                | Leadership or fiduciary role in other board, society, committee or advocacy group, paid or unpaid            | ___ None                                                                                                   |                     |
| 11                                | Stock or stock options                                                                                       | ___ None                                                                                                   |                     |
| 12                                | Receipt of equipment, materials, drugs, medical writing, gifts or other services                             | ___ None                                                                                                   |                     |
| 13                                | Other financial or non-financial interests                                                                   | ___ None                                                                                                   |                     |

|  |  |  |  |
|--|--|--|--|
|  |  |  |  |
|--|--|--|--|

**Please summarize the above conflict of interest in the following box:**

The author reports that this work was supported by the National Natural Science Foundation of China—Youth Projects (grant no. 81402012), the Shaanxi Natural Science Foundation (grant no. 2019JM-547), the Shaanxi Innovative Talents Cultivate Program (grant no. 2017KCT-28), the Operating Expenses of Basic Scientific Research Project of Xi'an Jiaotong University (grant no. xzy012019112), the Science and Technology Project of Xi'an (grant no. 2019114613YX-001SF035[3]), the Shaanxi Province Key Industry Innovation Chain (Group) Project—Social Development Field (no. 2021ZDLSF01-07), the Scientific and Technological Talents Support Plan of Shaanxi Provincial People's Hospital (Leading Talents) (no. 2021LJ-02), and the Scientific and Technological Talents Support Plan of Shaanxi Provincial People's Hospital (Top Talent) (no. 2021BJ-01).

**Please place an “X” next to the following statement to indicate your agreement:**

**X I certify that I have answered every question and have not altered the wording of any of the questions on this form.**

## ICMJE DISCLOSURE FORM

Date: August 5, 2022

Your Name: Yansong Pu

Manuscript Title: Manuscript Title: Identification and verification of a glycolysis-related gene signature for gastric cancer

Manuscript number (if known):

In the interest of transparency, we ask you to disclose all relationships/activities/interests listed below that are related to the content of your manuscript. "Related" means any relation with for-profit or not-for-profit third parties whose interests may be affected by the content of the manuscript. Disclosure represents a commitment to transparency and does not necessarily indicate a bias. If you are in doubt about whether to list a relationship/activity/interest, it is preferable that you do so.

The following questions apply to the author's relationships/activities/interests as they relate to the current manuscript only.

The author's relationships/activities/interests should be defined broadly. For example, if your manuscript pertains to the epidemiology of hypertension, you should declare all relationships with manufacturers of antihypertensive medication, even if that medication is not mentioned in the manuscript.

In item #1 below, report all support for the work reported in this manuscript without time limit. For all other items, the time frame for disclosure is the past 36 months.

|                                                           |                                                                                                                                                                                | Name all entities with whom you have this relationship or indicate none (add rows as needed)                                                                                                                                                                                                                                                                                                                                  | Specifications/Comments (e.g., if payments were made to you or to your institution)                                                                                                    |
|-----------------------------------------------------------|--------------------------------------------------------------------------------------------------------------------------------------------------------------------------------|-------------------------------------------------------------------------------------------------------------------------------------------------------------------------------------------------------------------------------------------------------------------------------------------------------------------------------------------------------------------------------------------------------------------------------|----------------------------------------------------------------------------------------------------------------------------------------------------------------------------------------|
| <b>Time frame: Since the initial planning of the work</b> |                                                                                                                                                                                |                                                                                                                                                                                                                                                                                                                                                                                                                               |                                                                                                                                                                                        |
| 1                                                         | All support for the present manuscript (e.g., funding, provision of study materials, medical writing, article processing charges, etc.)<br><b>No time limit for this item.</b> | the National Natural Science Foundation of China—Youth Projects<br>the Shaanxi Natural Science Foundation<br>the Shaanxi Innovative Talents Cultivate Program<br>the Operating Expenses of Basic Scientific Research Project of Xi'an Jiaotong University<br>the Science and Technology Project of Xi'an<br>the Shaanxi Province Key Industry Innovation Chain (Group) Project—Social Development Field<br>the Scientific and | grant no. 81402012<br>grant no. 2019JM-547<br>grant no. 2017KCT-28<br>grant no. xzy012019112<br>grant no. 2019114613YX- 001SF035[3]<br>grant no. 2021ZDLSF01-07<br>grant no. 2021LJ-02 |



|                                   |                                                                                                              |                                                                                                            |                     |
|-----------------------------------|--------------------------------------------------------------------------------------------------------------|------------------------------------------------------------------------------------------------------------|---------------------|
|                                   |                                                                                                              | Technological Talents Support Plan of Shaanxi Provincial People's Hospital (Leading Talents)               |                     |
|                                   |                                                                                                              | the Scientific and Technological Talents Support Plan of Shaanxi Provincial People's Hospital (Top Talent) | grant no. 2021BJ-01 |
| <b>Time frame: past 36 months</b> |                                                                                                              |                                                                                                            |                     |
| 2                                 | Grants or contracts from any entity (if not indicated in item #1 above).                                     | ___ None                                                                                                   |                     |
| 3                                 | Royalties or licenses                                                                                        | ___ None                                                                                                   |                     |
| 4                                 | Consulting fees                                                                                              | ___ None                                                                                                   |                     |
| 5                                 | Payment or honoraria for lectures, presentations, speakers bureaus, manuscript writing or educational events | ___ None                                                                                                   |                     |
| 6                                 | Payment for expert testimony                                                                                 | ___ None                                                                                                   |                     |
| 7                                 | Support for attending meetings and/or travel                                                                 | ___ None                                                                                                   |                     |
| 8                                 | Patents planned, issued or pending                                                                           | ___ None                                                                                                   |                     |
| 9                                 | Participation on a Data Safety Monitoring Board or Advisory Board                                            | ___ None                                                                                                   |                     |
| 10                                | Leadership or fiduciary role in other board, society, committee or advocacy group, paid or unpaid            | ___ None                                                                                                   |                     |
| 11                                | Stock or stock options                                                                                       | ___ None                                                                                                   |                     |
| 12                                | Receipt of equipment, materials, drugs, medical writing, gifts or other services                             | ___ None                                                                                                   |                     |
| 13                                | Other financial or non-financial interests                                                                   | ___ None                                                                                                   |                     |

|  |  |  |  |
|--|--|--|--|
|  |  |  |  |
|--|--|--|--|

**Please summarize the above conflict of interest in the following box:**

The author reports that this work was supported by the National Natural Science Foundation of China—Youth Projects (grant no. 81402012), the Shaanxi Natural Science Foundation (grant no. 2019JM-547), the Shaanxi Innovative Talents Cultivate Program (grant no. 2017KCT-28), the Operating Expenses of Basic Scientific Research Project of Xi'an Jiaotong University (grant no. xzy012019112), the Science and Technology Project of Xi'an (grant no. 2019114613YX-001SF035[3]), the Shaanxi Province Key Industry Innovation Chain (Group) Project—Social Development Field (no. 2021ZDLSF01-07), the Scientific and Technological Talents Support Plan of Shaanxi Provincial People's Hospital (Leading Talents) (no. 2021LJ-02), and the Scientific and Technological Talents Support Plan of Shaanxi Provincial People's Hospital (Top Talent) (no. 2021BJ-01).

**Please place an "X" next to the following statement to indicate your agreement:**

**X I certify that I have answered every question and have not altered the wording of any of the questions on this form.**

## ICMJE DISCLOSURE FORM

Date: August 5, 2022

Your Name: Xueping Huo

Manuscript Title: Manuscript Title: Identification and verification of a glycolysis-related gene signature for gastric cancer

Manuscript number (if known):

In the interest of transparency, we ask you to disclose all relationships/activities/interests listed below that are related to the content of your manuscript. "Related" means any relation with for-profit or not-for-profit third parties whose interests may be affected by the content of the manuscript. Disclosure represents a commitment to transparency and does not necessarily indicate a bias. If you are in doubt about whether to list a relationship/activity/interest, it is preferable that you do so.

The following questions apply to the author's relationships/activities/interests as they relate to the current manuscript only.

The author's relationships/activities/interests should be defined broadly. For example, if your manuscript pertains to the epidemiology of hypertension, you should declare all relationships with manufacturers of antihypertensive medication, even if that medication is not mentioned in the manuscript.

In item #1 below, report all support for the work reported in this manuscript without time limit. For all other items, the time frame for disclosure is the past 36 months.

|                                                           |                                                                                                                                                                                | Name all entities with whom you have this relationship or indicate none (add rows as needed)                                                                                                                                                                                                                                                                                                                                  | Specifications/Comments (e.g., if payments were made to you or to your institution)                                                                                                    |
|-----------------------------------------------------------|--------------------------------------------------------------------------------------------------------------------------------------------------------------------------------|-------------------------------------------------------------------------------------------------------------------------------------------------------------------------------------------------------------------------------------------------------------------------------------------------------------------------------------------------------------------------------------------------------------------------------|----------------------------------------------------------------------------------------------------------------------------------------------------------------------------------------|
| <b>Time frame: Since the initial planning of the work</b> |                                                                                                                                                                                |                                                                                                                                                                                                                                                                                                                                                                                                                               |                                                                                                                                                                                        |
| 1                                                         | All support for the present manuscript (e.g., funding, provision of study materials, medical writing, article processing charges, etc.)<br><b>No time limit for this item.</b> | the National Natural Science Foundation of China—Youth Projects<br>the Shaanxi Natural Science Foundation<br>the Shaanxi Innovative Talents Cultivate Program<br>the Operating Expenses of Basic Scientific Research Project of Xi'an Jiaotong University<br>the Science and Technology Project of Xi'an<br>the Shaanxi Province Key Industry Innovation Chain (Group) Project—Social Development Field<br>the Scientific and | grant no. 81402012<br>grant no. 2019JM-547<br>grant no. 2017KCT-28<br>grant no. xzy012019112<br>grant no. 2019114613YX- 001SF035[3]<br>grant no. 2021ZDLSF01-07<br>grant no. 2021LJ-02 |

|                                   |                                                                                                              |                                                                                                            |                     |
|-----------------------------------|--------------------------------------------------------------------------------------------------------------|------------------------------------------------------------------------------------------------------------|---------------------|
|                                   |                                                                                                              | Technological Talents Support Plan of Shaanxi Provincial People's Hospital (Leading Talents)               |                     |
|                                   |                                                                                                              | the Scientific and Technological Talents Support Plan of Shaanxi Provincial People's Hospital (Top Talent) | grant no. 2021BJ-01 |
| <b>Time frame: past 36 months</b> |                                                                                                              |                                                                                                            |                     |
| 2                                 | Grants or contracts from any entity (if not indicated in item #1 above).                                     | ___ None                                                                                                   |                     |
| 3                                 | Royalties or licenses                                                                                        | ___ None                                                                                                   |                     |
| 4                                 | Consulting fees                                                                                              | ___ None                                                                                                   |                     |
| 5                                 | Payment or honoraria for lectures, presentations, speakers bureaus, manuscript writing or educational events | ___ None                                                                                                   |                     |
| 6                                 | Payment for expert testimony                                                                                 | ___ None                                                                                                   |                     |
| 7                                 | Support for attending meetings and/or travel                                                                 | ___ None                                                                                                   |                     |
| 8                                 | Patents planned, issued or pending                                                                           | ___ None                                                                                                   |                     |
| 9                                 | Participation on a Data Safety Monitoring Board or Advisory Board                                            | ___ None                                                                                                   |                     |
| 10                                | Leadership or fiduciary role in other board, society, committee or advocacy group, paid or unpaid            | ___ None                                                                                                   |                     |
| 11                                | Stock or stock options                                                                                       | ___ None                                                                                                   |                     |
| 12                                | Receipt of equipment, materials, drugs, medical writing, gifts or other services                             | ___ None                                                                                                   |                     |
| 13                                | Other financial or non-financial interests                                                                   | ___ None                                                                                                   |                     |

|  |  |  |  |
|--|--|--|--|
|  |  |  |  |
|--|--|--|--|

**Please summarize the above conflict of interest in the following box:**

The author reports that this work was supported by the National Natural Science Foundation of China—Youth Projects (grant no. 81402012), the Shaanxi Natural Science Foundation (grant no. 2019JM-547), the Shaanxi Innovative Talents Cultivate Program (grant no. 2017KCT-28), the Operating Expenses of Basic Scientific Research Project of Xi'an Jiaotong University (grant no. xzy012019112), the Science and Technology Project of Xi'an (grant no. 2019114613YX-001SF035[3]), the Shaanxi Province Key Industry Innovation Chain (Group) Project—Social Development Field (no. 2021ZDLSF01-07), the Scientific and Technological Talents Support Plan of Shaanxi Provincial People's Hospital (Leading Talents) (no. 2021LJ-02), and the Scientific and Technological Talents Support Plan of Shaanxi Provincial People's Hospital (Top Talent) (no. 2021BJ-01).

**Please place an "X" next to the following statement to indicate your agreement:**

**X I certify that I have answered every question and have not altered the wording of any of the questions on this form.**

## ICMJE DISCLOSURE FORM

Date: August 5, 2022

Your Name: Jianhua Wang

Manuscript Title: Manuscript Title: Identification and verification of a glycolysis-related gene signature for gastric cancer

Manuscript number (if known):

In the interest of transparency, we ask you to disclose all relationships/activities/interests listed below that are related to the content of your manuscript. “Related” means any relation with for-profit or not-for-profit third parties whose interests may be affected by the content of the manuscript. Disclosure represents a commitment to transparency and does not necessarily indicate a bias. If you are in doubt about whether to list a relationship/activity/interest, it is preferable that you do so.

The following questions apply to the author’s relationships/activities/interests as they relate to the current manuscript only.

The author’s relationships/activities/interests should be defined broadly. For example, if your manuscript pertains to the epidemiology of hypertension, you should declare all relationships with manufacturers of antihypertensive medication, even if that medication is not mentioned in the manuscript.

In item #1 below, report all support for the work reported in this manuscript without time limit. For all other items, the time frame for disclosure is the past 36 months.

|                                                           |                                                                                                                                                                                | Name all entities with whom you have this relationship or indicate none (add rows as needed)                                                                                                                                                                                                                                                                                                                                  | Specifications/Comments (e.g., if payments were made to you or to your institution)                                                                                                    |
|-----------------------------------------------------------|--------------------------------------------------------------------------------------------------------------------------------------------------------------------------------|-------------------------------------------------------------------------------------------------------------------------------------------------------------------------------------------------------------------------------------------------------------------------------------------------------------------------------------------------------------------------------------------------------------------------------|----------------------------------------------------------------------------------------------------------------------------------------------------------------------------------------|
| <b>Time frame: Since the initial planning of the work</b> |                                                                                                                                                                                |                                                                                                                                                                                                                                                                                                                                                                                                                               |                                                                                                                                                                                        |
| 1                                                         | All support for the present manuscript (e.g., funding, provision of study materials, medical writing, article processing charges, etc.)<br><b>No time limit for this item.</b> | the National Natural Science Foundation of China—Youth Projects<br>the Shaanxi Natural Science Foundation<br>the Shaanxi Innovative Talents Cultivate Program<br>the Operating Expenses of Basic Scientific Research Project of Xi’an Jiaotong University<br>the Science and Technology Project of Xi’an<br>the Shaanxi Province Key Industry Innovation Chain (Group) Project—Social Development Field<br>the Scientific and | grant no. 81402012<br>grant no. 2019JM-547<br>grant no. 2017KCT-28<br>grant no. xzy012019112<br>grant no. 2019114613YX- 001SF035[3]<br>grant no. 2021ZDLSF01-07<br>grant no. 2021LJ-02 |

|                                   |                                                                                                              |                                                                                                            |                     |
|-----------------------------------|--------------------------------------------------------------------------------------------------------------|------------------------------------------------------------------------------------------------------------|---------------------|
|                                   |                                                                                                              | Technological Talents Support Plan of Shaanxi Provincial People's Hospital (Leading Talents)               |                     |
|                                   |                                                                                                              | the Scientific and Technological Talents Support Plan of Shaanxi Provincial People's Hospital (Top Talent) | grant no. 2021BJ-01 |
| <b>Time frame: past 36 months</b> |                                                                                                              |                                                                                                            |                     |
| 2                                 | Grants or contracts from any entity (if not indicated in item #1 above).                                     | ___ None                                                                                                   |                     |
| 3                                 | Royalties or licenses                                                                                        | ___ None                                                                                                   |                     |
| 4                                 | Consulting fees                                                                                              | ___ None                                                                                                   |                     |
| 5                                 | Payment or honoraria for lectures, presentations, speakers bureaus, manuscript writing or educational events | ___ None                                                                                                   |                     |
| 6                                 | Payment for expert testimony                                                                                 | ___ None                                                                                                   |                     |
| 7                                 | Support for attending meetings and/or travel                                                                 | ___ None                                                                                                   |                     |
| 8                                 | Patents planned, issued or pending                                                                           | ___ None                                                                                                   |                     |
| 9                                 | Participation on a Data Safety Monitoring Board or Advisory Board                                            | ___ None                                                                                                   |                     |
| 10                                | Leadership or fiduciary role in other board, society, committee or advocacy group, paid or unpaid            | ___ None                                                                                                   |                     |
| 11                                | Stock or stock options                                                                                       | ___ None                                                                                                   |                     |
| 12                                | Receipt of equipment, materials, drugs, medical writing, gifts or other services                             | ___ None                                                                                                   |                     |
| 13                                | Other financial or non-financial interests                                                                   | ___ None                                                                                                   |                     |

|  |  |  |  |
|--|--|--|--|
|  |  |  |  |
|--|--|--|--|

**Please summarize the above conflict of interest in the following box:**

The author reports that this work was supported by the National Natural Science Foundation of China—Youth Projects (grant no. 81402012), the Shaanxi Natural Science Foundation (grant no. 2019JM-547), the Shaanxi Innovative Talents Cultivate Program (grant no. 2017KCT-28), the Operating Expenses of Basic Scientific Research Project of Xi’an Jiaotong University (grant no. xzy012019112), the Science and Technology Project of Xi’an (grant no. 2019114613YX- 001SF035[3]), the Shaanxi Province Key Industry Innovation Chain (Group) Project—Social Development Field (no. 2021ZDLSF01-07), the Scientific and Technological Talents Support Plan of Shaanxi Provincial People's Hospital (Leading Talents) (no. 2021LJ-02), and the Scientific and Technological Talents Support Plan of Shaanxi Provincial People’s Hospital (Top Talent) (no.2021BJ-01).

**Please place an “X” next to the following statement to indicate your agreement:**

**X I certify that I have answered every question and have not altered the wording of any of the questions on this form.**
