# Supplementary material for: Identification and verification of a glycolysis-related gene signature for gastric cancer
Source: PubMed Central journal article supplement — Ann Transl Med. 2022 Sep;10(18):1010. doi: 10.21037/atm-22-3980 (PMC9577805; doi:10.21037/atm-22-3980), 2022-09
Supplement: atm-10-18-1010-supplementary.pdf [file atm-10-18-1010-supplementary.pdf]

## Appendix 1

---

|                                                          |                |
|----------------------------------------------------------|----------------|
| #Current Version                                         | <i>NUP155</i>  |
| #MSigDB database v7.1 updated March 2020. Release notes. | <i>NUP160</i>  |
| <i>GAPDH</i>                                             | <i>NUP188</i>  |
| <i>GPI</i>                                               | <i>NUP205</i>  |
| <i>HK1</i>                                               | <i>NUP210</i>  |
| <i>PFKFB1</i>                                            | <i>NUP214</i>  |
| <i>PFKFB2</i>                                            | <i>NUP35</i>   |
| <i>PFKFB3</i>                                            | <i>NUP37</i>   |
| <i>PFKFB4</i>                                            | <i>NUP42</i>   |
| <i>PPP2CA</i>                                            | <i>NUP43</i>   |
| <i>PPP2CB</i>                                            | <i>NUP50</i>   |
| <i>PPP2R1A</i>                                           | <i>NUP54</i>   |
| <i>PPP2R1B</i>                                           | <i>NUP58</i>   |
| <i>PPP2R5D</i>                                           | <i>NUP62</i>   |
| <i>PRKACA</i>                                            | <i>NUP85</i>   |
| <i>PRKACB</i>                                            | <i>NUP88</i>   |
| <i>PRKACG</i>                                            | <i>NUP93</i>   |
| <i>AAAS</i>                                              | <i>NUP98</i>   |
| <i>ADPGK</i>                                             | <i>PFKL</i>    |
| <i>ALDOA</i>                                             | <i>PFKM</i>    |
| <i>ALDOB</i>                                             | <i>PFKP</i>    |
| <i>ALDOC</i>                                             | <i>PGAM1</i>   |
| <i>BPGM</i>                                              | <i>PGAM2</i>   |
| <i>ENO1</i>                                              | <i>PGK1</i>    |
| <i>ENO2</i>                                              | <i>PGK2</i>    |
| <i>ENO3</i>                                              | <i>PGM2L1</i>  |
| <i>GAPDHS</i>                                            | <i>PGP</i>     |
| <i>GCK</i>                                               | <i>PKLR</i>    |
| <i>GCKR</i>                                              | <i>PKM</i>     |
| <i>GNPDA1</i>                                            | <i>POM121</i>  |
| <i>GNPDA2</i>                                            | <i>POM121C</i> |
| <i>HK2</i>                                               | <i>RAE1</i>    |
| <i>HK3</i>                                               | <i>RANBP2</i>  |
| <i>NDC1</i>                                              | <i>SEC13</i>   |
| <i>NUP107</i>                                            | <i>SEH1L</i>   |
| <i>NUP133</i>                                            | <i>TPI1</i>    |
| <i>NUP153</i>                                            | <i>TPR</i>     |

---

---

|                |                |
|----------------|----------------|
| <i>BID</i>     | <i>PDHA2</i>   |
| <i>CD4</i>     | <i>PDHB</i>    |
| <i>FBP1</i>    | <i>PGAM4</i>   |
| <i>FBP2</i>    | <i>PGM2</i>    |
| <i>PGM1</i>    | <i>ABCB6</i>   |
| <i>ACSS1</i>   | <i>ADORA2B</i> |
| <i>ACSS2</i>   | <i>AGL</i>     |
| <i>ADH1A</i>   | <i>AGRN</i>    |
| <i>ADH1B</i>   | <i>AK3</i>     |
| <i>ADH1C</i>   | <i>AK4</i>     |
| <i>ADH4</i>    | <i>ALG1</i>    |
| <i>ADH5</i>    | <i>ANG</i>     |
| <i>ADH6</i>    | <i>ANGPTL4</i> |
| <i>ADH7</i>    | <i>ANKZF1</i>  |
| <i>AKR1A1</i>  | <i>ARPP19</i>  |
| <i>ALDH1A3</i> | <i>ARTN</i>    |
| <i>ALDH1B1</i> | <i>AURKA</i>   |
| <i>ALDH2</i>   | <i>B3GALT6</i> |
| <i>ALDH3A1</i> | <i>B3GAT1</i>  |
| <i>ALDH3A2</i> | <i>B3GAT3</i>  |
| <i>ALDH3B1</i> | <i>B3GNT3</i>  |
| <i>ALDH3B2</i> | <i>B4GALT1</i> |
| <i>ALDH7A1</i> | <i>B4GALT2</i> |
| <i>ALDH9A1</i> | <i>B4GALT4</i> |
| <i>DLAT</i>    | <i>B4GALT7</i> |
| <i>DLD</i>     | <i>BIK</i>     |
| <i>G6PC</i>    | <i>BPNT1</i>   |
| <i>G6PC2</i>   | <i>CACNA1H</i> |
| <i>GALM</i>    | <i>CAPN5</i>   |
| <i>LDHA</i>    | <i>CASP6</i>   |
| <i>LDHAL6A</i> | <i>CD44</i>    |
| <i>LDHAL6B</i> | <i>CDK1</i>    |
| <i>LDHB</i>    | <i>CENPA</i>   |
| <i>LDHC</i>    | <i>CHPF</i>    |
| <i>PCK1</i>    | <i>CHPF2</i>   |
| <i>PCK2</i>    | <i>CHST1</i>   |
| <i>PDHA1</i>   | <i>CHST12</i>  |

---

---

CHST2  
CHST4  
CHST6  
CITED2  
CLDN3  
CLDN9  
CLN6  
COG2  
COL5A1  
COPB2  
CTH  
CXCR4  
CYB5A  
DCN  
DDIT4  
DEPDC1  
DPYSL4  
DSC2  
ECD  
EFNA3  
EGFR  
EGLN3  
ELF3  
ERO1A  
EXT1  
EXT2  
FAM162A  
FKBP4  
FUT8  
G6PD  
GAL3ST1  
GALE  
GALK1  
GALK2  
GCLC  
GFPT1  
GLCE  
GLRX

---

---

GMPPA  
GMPPB  
GNE  
GOT1  
GOT2  
GPC1  
GPC3  
GPC4  
GPR87  
GUSB  
GYS1  
GYS2  
HAX1  
HDLBP  
HMMR  
HOMER1  
HS2ST1  
HS6ST2  
HSPA5  
IDH1  
IDUA  
IER3  
IGFBP3  
IL13RA1  
IRS2  
ISG20  
KDEL3  
KIF20A  
KIF2A  
LCT  
LHPP  
LHX9  
MDH1  
MDH2  
ME1  
ME2  
MED24  
MERTK

---

---

*MET*  
*MIF*  
*MIOX*  
*MPI*  
*MXI1*  
*NANP*  
*NASP*  
*NDST3*  
*NDUFV3*  
*NOL3*  
*NSDHL*  
*NT5E*  
*P4HA1*  
*P4HA2*  
*PAM*  
*PAXIP1*  
*PC*  
*PK3*  
*PGLS*  
*PHKA2*  
*PKP2*  
*PLOD1*  
*PLOD2*  
*PMM2*  
*POLR3K*  
*PPFIA4*  
*PPIA*  
*PRPS1*  
*PSMC4*  
*PYGB*  
*PYGL*  
*QSOX1*  
*RARS1*  
*RBCK1*

---

---

*RPE*  
*RRAGD*  
*SAP30*  
*SDC1*  
*SDC2*  
*SDC3*  
*SDHC*  
*SLC16A3*  
*SLC25A10*  
*SLC25A13*  
*SLC35A3*  
*SLC37A4*  
*SOD1*  
*SOX9*  
*SPAG4*  
*SRD5A3*  
*STC1*  
*STC2*  
*STMN1*  
*TALDO1*  
*TFF3*  
*TGFA*  
*TGFBI*  
*TKTL1*  
*TPBG*  
*TPST1*  
*TSTA3*  
*TXN*  
*UGP2*  
*VCAN*  
*VEGFA*  
*VLDLR*  
*XYLT2*  
*ZNF292*

---
